# Supplementary material
Source: Springer Nature journal article supplement (https://www.springermedizin.de/resource/supplementary/40164_2014_94_MOESM2_ESM.pdf/9687182)

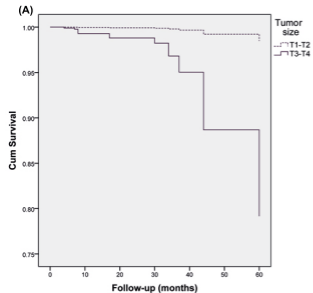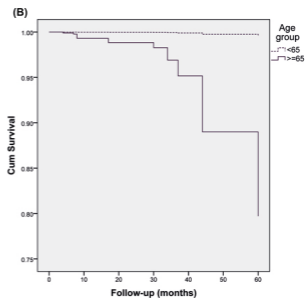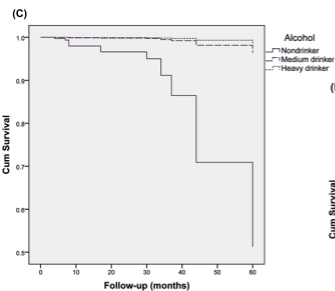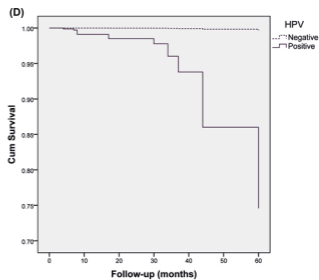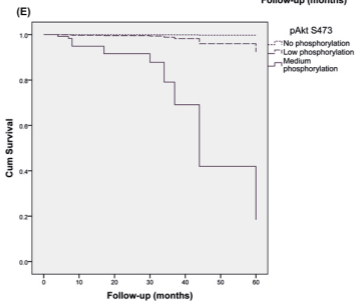

Supplement: MOESM2 [file 9687182]
